# Supplementary material for: Comprehensive Analysis Identifies Ameloblastin-Related Competitive Endogenous RNA as a Prognostic Biomarker for Testicular Germ Cell Tumour
Source: MDPI journal article supplement (doi:10.3390/cancers14081870), 2022-04-07
Supplement: s1 [file s1]

**Table S1.** Baseline information sheet for AMBN

| Tumour type              | Number |
|--------------------------|--------|
| Total                    | 139    |
| Embryonal carcinoma, NOS | 26     |
| Seminoma, NOS            | 68     |
| Teratoma, benign         | 6      |
| Teratoma, malignant, NOS | 3      |
| Mixed germ cell tumor    | 30     |
| Yolk sac tumor           | 4      |
| Teratocarcinoma          | 2      |

**Table S2. Information of TGCT patients**

Please find Table S2 in the separate .xlsx file.

**Table S3.** List of cancers analysed in the present study

ACC, Adrenocortical carcinoma

BLCA, Bladder Urothelial Carcinoma

BRCA, Breast invasive carcinoma

CESC, Cervical squamous cell carcinoma and endocervical adenocarcinoma

CHOL, Cholangiocarcinoma

COAD, Colon adenocarcinoma

DLBC, Lymphoid Neoplasm Diffuse Large B-cell Lymphoma

ESCA, Esophageal carcinoma

GBM, Glioblastoma multiforme

HNSC, Head and Neck squamous cell carcinoma

KICH, Kidney Chromophobe

KIRC, Kidney renal clear cell carcinoma

KIRP, Kidney renal papillary cell carcinoma

LAML, Acute Myeloid Leukemia

LGG, Lower Grade GLioma

LIHC, Liver hepatocellular carcinoma

LUAD, Lung adenocarcinoma

LUSC, Lung squamous cell carcinoma

MESO, Mesothelioma

OV, Ovarian serous cystadenocarcinoma

PAAD, Pancreatic adenocarcinoma

PCPG, Pheochromocytoma and Paraganglioma

PRAD, Prostate adenocarcinoma

READ, Rectum adenocarcinoma

SARC, Sarcoma

SKCM, Skin Cutaneous Melanoma

STAD, Stomach adenocarcinoma

TGCT, Testicular Germ Cell Tumor

THCA, Thyroid carcinoma

THYM, Thymoma

UCEC, Uterine Corpus Endometrial Carcinoma

UCS, Uterine Carcinosarcoma

UVM, Uveal Melanoma

**Table S4.** Single/multivariate Cox regression analysis report of GFAP

| Characteristics               | Total(N)   | Univariate analysis        |              | Multivariate analysis                                    |                  |
|-------------------------------|------------|----------------------------|--------------|----------------------------------------------------------|------------------|
|                               |            | Hazard ratio (95% CI)      | P value      | Hazard ratio (95% CI)                                    | P value          |
| <b>GFAP</b>                   | <b>134</b> |                            |              |                                                          |                  |
| <b>Low</b>                    | <b>67</b>  | <b>Reference</b>           |              |                                                          |                  |
| <b>High</b>                   | <b>67</b>  | <b>1.261 (0.644-2.469)</b> | <b>0.500</b> |                                                          |                  |
| <b>Pathologic stage</b>       | <b>127</b> |                            |              |                                                          |                  |
| <b>Stage I</b>                | <b>101</b> | <b>Reference</b>           |              |                                                          |                  |
| <b>Stage II&amp;Stage III</b> | <b>26</b>  | <b>0.244 (0.074-0.808)</b> | <b>0.021</b> | <b>41489858.955<br/>(5529241.739-<br/>311328112.866)</b> | <b>&lt;0.001</b> |

| Characteristics                | Total(N)   | Univariate analysis   |         | Multivariate analysis                          |         |
|--------------------------------|------------|-----------------------|---------|------------------------------------------------|---------|
|                                |            | Hazard ratio (95% CI) | P value | Hazard ratio (95% CI)                          | P value |
| <b>Clinical stage</b>          | <b>108</b> |                       |         |                                                |         |
| Stage I                        | 93         | Reference             |         |                                                |         |
| Stage III                      | 15         | 0.413 (0.125-1.365)   | 0.147   |                                                |         |
| <b>Radiation therapy</b>       | <b>132</b> |                       |         |                                                |         |
| No                             | 110        | Reference             |         |                                                |         |
| Yes                            | 22         | 0.738 (0.286-1.905)   | 0.530   |                                                |         |
| <b>Primary therapy outcome</b> | <b>83</b>  |                       |         |                                                |         |
| PR&PD                          | 14         | Reference             |         |                                                |         |
| CR                             | 69         | 7.730 (1.040-57.479)  | 0.046   | 91975579.183 (0.000-Inf)                       | 0.998   |
| <b>Race</b>                    | <b>129</b> |                       |         |                                                |         |
| Asian                          | 4          | Reference             |         |                                                |         |
| Black or African American      | 6          | 4.700 (0.485-45.582)  | 0.182   | 1328792526.067 (155125647.423-11382318827.779) | <0.001  |
| White                          | 119        | 1.043 (0.142-7.680)   | 0.967   | 179793514.854 (20989420.789-1540095284.601)    | <0.001  |
| <b>Age</b>                     | <b>134</b> |                       |         |                                                |         |
| ≤30                            | 64         | Reference             |         |                                                |         |
| >30                            | 70         | 0.713 (0.366-1.388)   | 0.320   |                                                |         |
| <b>Serum tumor markers(S)</b>  | <b>120</b> |                       |         |                                                |         |
| S0                             | 43         | Reference             |         |                                                |         |
| S1                             | 38         | 1.674 (0.646-4.337)   | 0.289   |                                                |         |
| S2                             | 34         | 2.727 (1.094-6.794)   | 0.031   |                                                |         |

| Characteristics                             | Total(N) | Univariate analysis   |         | Multivariate analysis |         |
|---------------------------------------------|----------|-----------------------|---------|-----------------------|---------|
|                                             |          | Hazard ratio (95% CI) | P value | Hazard ratio (95% CI) | P value |
| S3                                          | 5        | 3.980 (0.824-19.229)  | 0.086   |                       |         |
| Lymphovascular invasion                     | 130      |                       |         |                       |         |
| No                                          | 75       | Reference             |         |                       |         |
| Yes                                         | 55       | 1.553 (0.800-3.014)   | 0.194   |                       |         |
| Testicular intratubular germ cell neoplasia | 125      |                       |         |                       |         |
| Absent                                      | 68       | Reference             |         |                       |         |
| Present                                     | 57       | 0.742 (0.373-1.476)   | 0.395   |                       |         |
| History of undescended testis               | 127      |                       |         |                       |         |
| No                                          | 104      | Reference             |         |                       |         |
| Yes                                         | 23       | 0.631 (0.244-1.630)   | 0.342   |                       |         |
| Family history of testicular cancer         | 118      |                       |         |                       |         |
| No                                          | 104      | Reference             |         |                       |         |
| Yes                                         | 14       | 3.306 (1.474-7.416)   | 0.004   | 2.057 (0.758-5.585)   | 0.157   |
| Laterality                                  | 129      |                       |         |                       |         |
| Left                                        | 72       | Reference             |         |                       |         |
| Right                                       | 57       | 1.236 (0.611-2.503)   | 0.556   |                       |         |
| Pathologic T stage                          | 133      |                       |         |                       |         |
| T1                                          | 76       | Reference             |         |                       |         |
| T2&T3                                       | 57       | 1.305 (0.672-2.535)   | 0.432   |                       |         |
| Pathologic N stage                          | 59       |                       |         |                       |         |
| N0                                          | 46       | Reference             |         |                       |         |

| Characteristics    | Total(N) | Univariate analysis   |         | Multivariate analysis |         |
|--------------------|----------|-----------------------|---------|-----------------------|---------|
|                    |          | Hazard ratio (95% CI) | P value | Hazard ratio (95% CI) | P value |
| N1&N2              | 13       | 0.123 (0.017-0.916)   | 0.041   | 1.000 (0.133-7.504)   | 1.000   |
| Pathologic M stage | 119      |                       |         |                       |         |
| M0                 | 115      | Reference             |         |                       |         |
| M1                 | 4        | 0.000 (0.000-Inf)     | 0.996   |                       |         |
| Clinical T stage   | 113      |                       |         |                       |         |
| T1                 | 64       | Reference             |         |                       |         |
| T2&T3              | 49       | 0.918 (0.459-1.834)   | 0.808   |                       |         |
| Clinical N stage   | 108      |                       |         |                       |         |
| N0                 | 78       | Reference             |         |                       |         |
| N1&N2&N3           | 30       | 0.248 (0.086-0.718)   | 0.010   | 0.000 (0.000-0.000)   | <0.001  |
| Clinical M stage   | 128      |                       |         |                       |         |
| M0                 | 120      | Reference             |         |                       |         |
| M1                 | 8        | 0.723 (0.173-3.028)   | 0.657   |                       |         |

Table S5. Single/multivariate Cox regression analysis report of PELATON

| Characteristics    | Total(N) | Univariate analysis   |         | Multivariate analysis      |                        |
|--------------------|----------|-----------------------|---------|----------------------------|------------------------|
|                    |          | Hazard ratio (95% CI) | P value | Hazard ratio (95% CI)      | P value                |
| PELATON            | 134      |                       |         |                            |                        |
| Low                | 67       | Reference             |         |                            |                        |
| High               | 67       | 2.136 (1.073-4.250)   | 0.031   | 2.868 (1.102-7.462)        | 0.031                  |
| Pathologic stage   | 127      |                       |         |                            |                        |
| Stage I            | 101      | Reference             |         |                            |                        |
| Stage II&Stage III | 26       | 0.244 (0.074-0.808)   | 0.021   | 3527424.573 (26497652.318) | (469578.360-<br><0.001 |

| Characteristics           | Total(N)              | Univariate analysis   |         | Multivariate analysis                      |         |
|---------------------------|-----------------------|-----------------------|---------|--------------------------------------------|---------|
|                           |                       | Hazard ratio (95% CI) | P value | Hazard ratio (95% CI)                      | P value |
| Clinical stage            | 108                   |                       |         |                                            |         |
| Stage I                   | 93                    | Reference             |         |                                            |         |
| Stage III                 | 15                    | 0.413 (0.125-1.365)   | 0.147   |                                            |         |
| Radiation therapy         | 132                   |                       |         |                                            |         |
| No                        | 110                   | Reference             |         |                                            |         |
| Yes                       | 22                    | 0.738 (0.286-1.905)   | 0.530   |                                            |         |
| Primary outcome           | therapy <sub>83</sub> |                       |         |                                            |         |
| PR&PD                     | 14                    | Reference             |         |                                            |         |
| CR                        | 69                    | 7.730 (1.040-57.479)  | 0.046   | 9667181.242 (0.000-Inf)                    | 0.994   |
| Race                      | 129                   |                       |         |                                            |         |
| Asian                     | 4                     | Reference             |         |                                            |         |
| Black or African American | 6                     | 4.700 (0.485-45.582)  | 0.182   | 100294585.597 (11692161.902-860320271.368) | <0.001  |
| White                     | 119                   | 1.043 (0.142-7.680)   | 0.967   | 20643123.098 (2406538.096-177075331.538)   | <0.001  |
| Age                       | 134                   |                       |         |                                            |         |
| <=30                      | 64                    | Reference             |         |                                            |         |
| >30                       | 70                    | 0.713 (0.366-1.388)   | 0.320   |                                            |         |
| Serum markers(S)          | tumor <sub>120</sub>  |                       |         |                                            |         |
| S0                        | 43                    | Reference             |         |                                            |         |
| S1                        | 38                    | 1.674 (0.646-4.337)   | 0.289   |                                            |         |
| S2                        | 34                    | 2.727 (1.094-6.794)   | 0.031   |                                            |         |
| S3                        | 5                     | 3.980 (0.824-19.229)  | 0.086   |                                            |         |

| Characteristics                                    | Total(N)   | Univariate analysis   |         | Multivariate analysis |         |
|----------------------------------------------------|------------|-----------------------|---------|-----------------------|---------|
|                                                    |            | Hazard ratio (95% CI) | P value | Hazard ratio (95% CI) | P value |
| <b>Lymphovascular invasion</b>                     | <b>130</b> |                       |         |                       |         |
| No                                                 | 75         | Reference             |         |                       |         |
| Yes                                                | 55         | 1.553 (0.800-3.014)   | 0.194   |                       |         |
| <b>Testicular intratubular germ cell neoplasia</b> | <b>125</b> |                       |         |                       |         |
| Absent                                             | 68         | Reference             |         |                       |         |
| Present                                            | 57         | 0.742 (0.373-1.476)   | 0.395   |                       |         |
| <b>History of undescended testis</b>               | <b>127</b> |                       |         |                       |         |
| No                                                 | 104        | Reference             |         |                       |         |
| Yes                                                | 23         | 0.631 (0.244-1.630)   | 0.342   |                       |         |
| <b>Family history of testicular cancer</b>         | <b>118</b> |                       |         |                       |         |
| No                                                 | 104        | Reference             |         |                       |         |
| Yes                                                | 14         | 3.306 (1.474-7.416)   | 0.004   | 2.363 (0.864-6.461)   | 0.094   |
| <b>Laterality</b>                                  | <b>129</b> |                       |         |                       |         |
| Left                                               | 72         | Reference             |         |                       |         |
| Right                                              | 57         | 1.236 (0.611-2.503)   | 0.556   |                       |         |
| <b>Pathologic T stage</b>                          | <b>133</b> |                       |         |                       |         |
| T1                                                 | 76         | Reference             |         |                       |         |
| T2&T3                                              | 57         | 1.305 (0.672-2.535)   | 0.432   |                       |         |
| <b>Pathologic N stage</b>                          | <b>59</b>  |                       |         |                       |         |
| N0                                                 | 46         | Reference             |         |                       |         |

| Characteristics    | Total(N) | Univariate analysis   |         | Multivariate analysis |         |
|--------------------|----------|-----------------------|---------|-----------------------|---------|
|                    |          | Hazard ratio (95% CI) | P value | Hazard ratio (95% CI) | P value |
| N1&N2              | 13       | 0.123 (0.017-0.916)   | 0.041   | 1.000 (0.133-7.512)   | 1.000   |
| Pathologic M stage | 119      |                       |         |                       |         |
| M0                 | 115      | Reference             |         |                       |         |
| M1                 | 4        | 0.000 (0.000-Inf)     | 0.996   |                       |         |
| Clinical T stage   | 113      |                       |         |                       |         |
| T1                 | 64       | Reference             |         |                       |         |
| T2&T3              | 49       | 0.918 (0.459-1.834)   | 0.808   |                       |         |
| Clinical N stage   | 108      |                       |         |                       |         |
| N0                 | 78       | Reference             |         |                       |         |
| N1&N2&N3           | 30       | 0.248 (0.086-0.718)   | 0.010   | 0.000 (0.000-0.000)   | <0.001  |
| Clinical M stage   | 128      |                       |         |                       |         |
| M0                 | 120      | Reference             |         |                       |         |
| M1                 | 8        | 0.723 (0.173-3.028)   | 0.657   |                       |         |

Table S6. Single gene logistics regression analysis report of PELATON

| Characteristics                                                  | Total(N) | Odds Ratio(OR)      | P value |
|------------------------------------------------------------------|----------|---------------------|---------|
| Pathologic stage (Stage II&Stage III vs. Stage I)                | 127      | 1.632 (0.684-4.050) | 0.276   |
| Clinical stage (Stage II&Stage III vs. Stage I)                  | 125      | 1.938 (0.860-4.517) | 0.115   |
| Radiation therapy (Yes vs. No)                                   | 132      | 1.244 (0.496-3.178) | 0.641   |
| Primary therapy outcome (CR vs. PD&PR)                           | 83       | 1.088 (0.342-3.619) | 0.887   |
| Age (>30 vs. <=30)                                               | 134      | 1.271 (0.645-2.516) | 0.489   |
| Lymphovascular invasion (Yes vs. No)                             | 130      | 2.689 (1.320-5.611) | 0.007   |
| Testicular intratubular germ cell neoplasia (Present vs. Absent) | 125      | 0.910 (0.449-1.843) | 0.794   |



---

| Characteristics                                  | Total(N) | Odds Ratio(OR)      | P value |
|--------------------------------------------------|----------|---------------------|---------|
| History of undescended testis (Yes vs. No)       | 127      | 1.300 (0.525-3.299) | 0.572   |
| Family history of testicular cancer (Yes vs. No) | 118      | 0.495 (0.144-1.533) | 0.234   |
| Laterality (Right vs. Left)                      | 129      | 0.417 (0.202-0.844) | 0.016   |

---
